# Supplementary material for: Uncoordinated expression of DNA methylation-related enzymes in human cancer
Source: PubMed Central journal article supplement (PMC5727647; doi:10.1186/s13072-017-0170-0), 2017-12-12

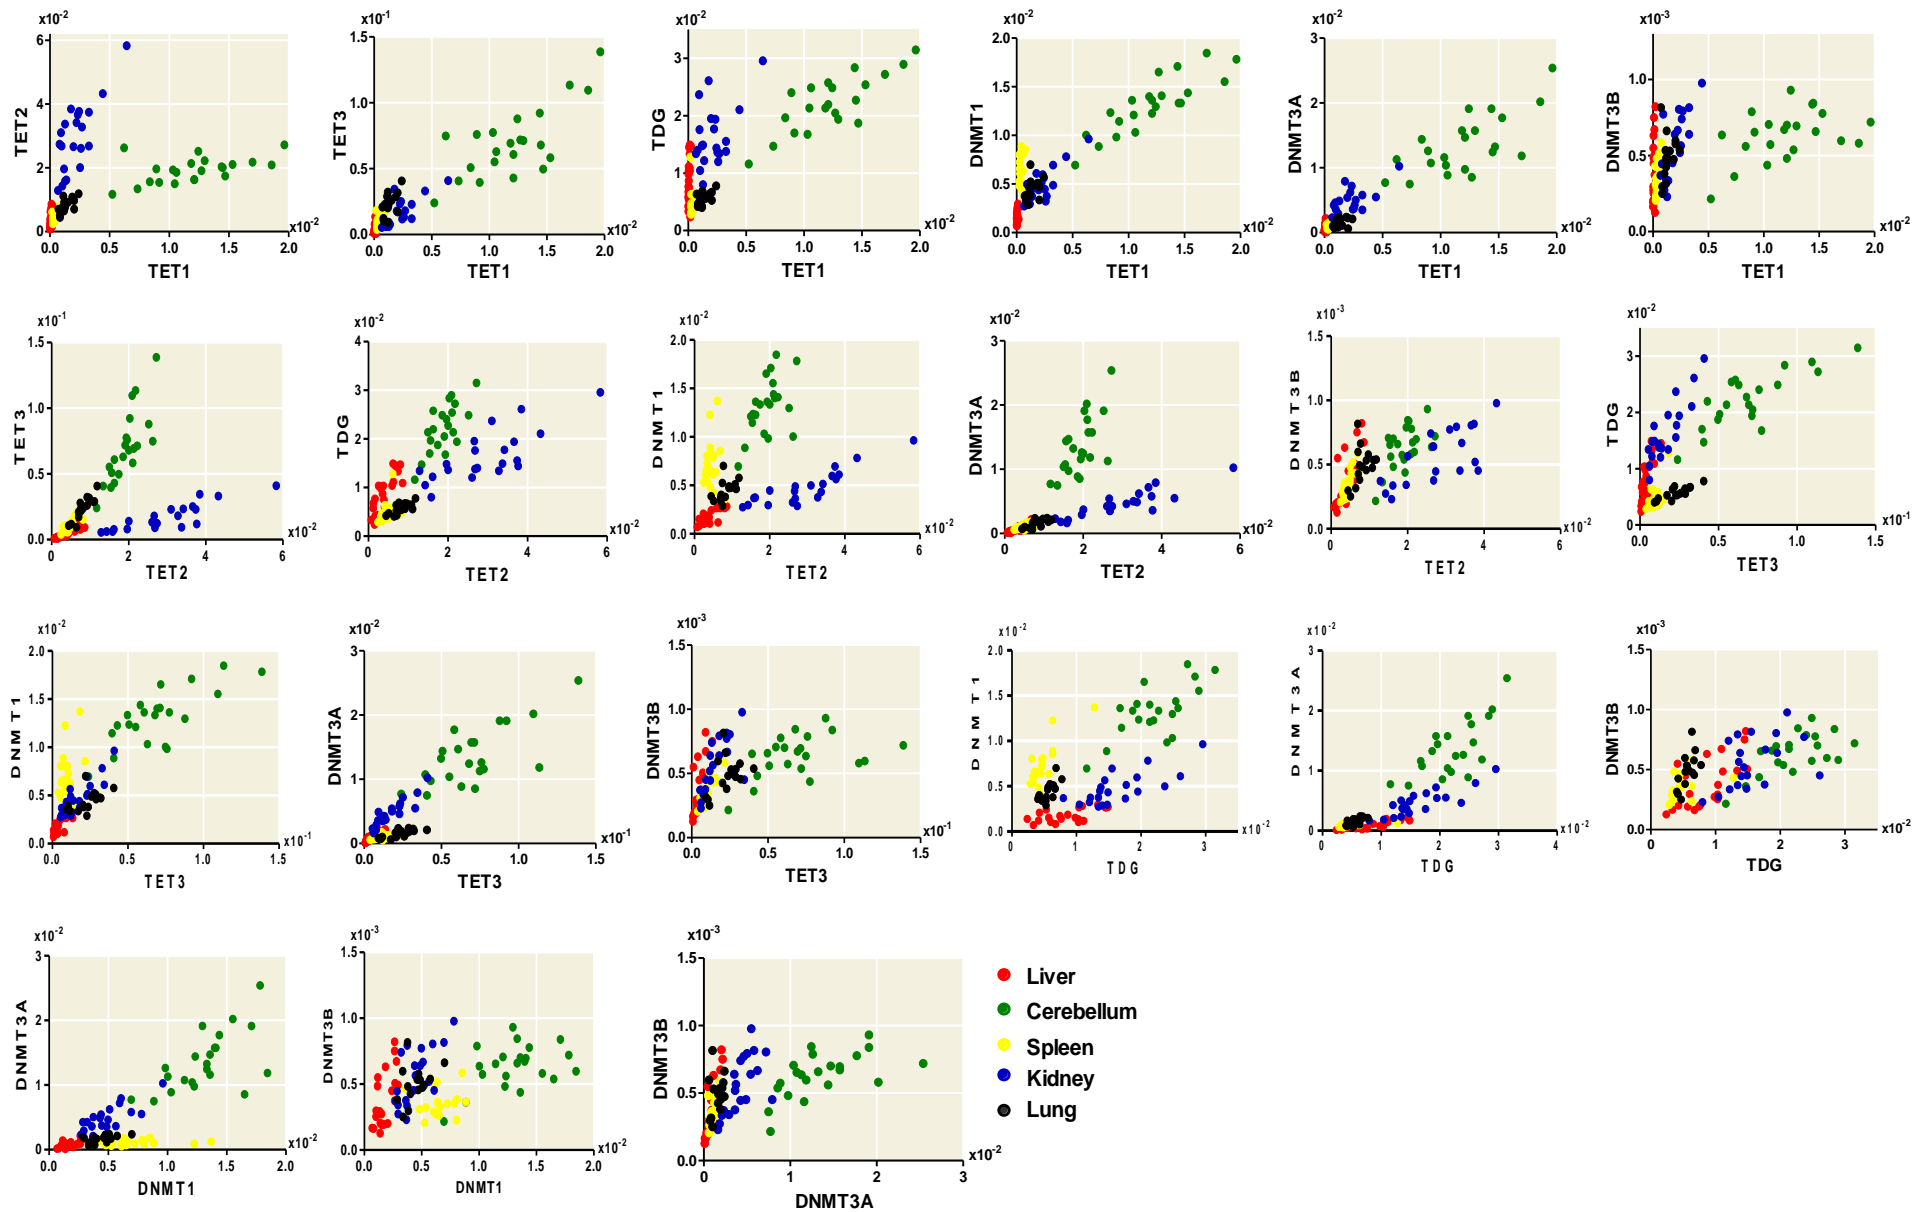

Supplement: 13072_2017_170_MOESM1_ESM.pdf [file 13072_2017_170_MOESM1_ESM.pdf]
